# Supplementary material for: Development of a selective sorbent based on a magnetic ion imprinted polymer for the preconcentration and FAAS determination of urinary cadmium
Source: Royal Society of Chemistry journal article supplement (doi:10.1039/c4ay03066d), 2015-01-01

# **Development of selective sorbent based on magnetic ion imprinted polymer for preconcentration and FAAS determination of urinary cadmium**

Zahra Panjali<sup>1</sup>, Ali Akbar Asgharinezhad<sup>2</sup>, Homeira Ebrahimzadeh Mabood<sup>2</sup>, Sara Karami<sup>2</sup>, Masood Loni<sup>2</sup>, Mehdi Rezvani<sup>2</sup>, Rasoul Yarahmadi<sup>3</sup>, Seyed Jamaledin Shahtaheri<sup>\*1,4</sup>

<sup>1</sup>*Department of Occupational Health Engineering, School of Public Health, Tehran University of Medical Sciences, Tehran, Iran.*

<sup>2</sup>*Department of Applied Chemistry, School of Chemistry, Shahid Beheshti University, Tehran, Iran.*

<sup>3</sup>*Department of Occupational Health Engineering, School of Public Health, Iran University of Medical Sciences, Tehran, Iran.*

<sup>4</sup>*Institute for Environmental Research, Tehran University of Medical Sciences, Tehran, Iran.*

**Table 1S:** The tolerance limit of various ions on the determination of cadmium

| <b>Potentially interfering ions</b> | <b>Tolerable concentration ratio X/Cd(II) *</b> | <b>% Recovery</b> |
|-------------------------------------|-------------------------------------------------|-------------------|
| Zn <sup>2+</sup>                    | 2000                                            | 96.4              |
| Pb <sup>2+</sup>                    | 2000                                            | 97.4              |
| Na <sup>+</sup>                     | 2000                                            | 94.7              |
| Cu <sup>2+</sup>                    | 2000                                            | 96.0              |

Conditions: sample pH, 7.0; eluent volume 4.0 mL (2 mol L<sup>-1</sup> HCl); sorption and elution time 5.0 min

**Table 2S:** Day-to-day (D-day) and within day (W-day) reproducibility of cadmium determination in aqueous sample. Sample volume 25 mL, N = 6.

| Statistical data | Concentration added ( $\mu\text{g L}^{-1}$ ) |       |       |       |       |       |
|------------------|----------------------------------------------|-------|-------|-------|-------|-------|
|                  | 2                                            |       | 10    |       | 50    |       |
|                  | D-day                                        | W-day | D-day | W-day | D-day | W-day |
| Mean             | 4.63                                         | 3.49  | 11.76 | 11.29 | 50.91 | 50.69 |
| SD               | 0.43                                         | 0.51  | 0.79  | 0.66  | 0.88  | 0.70  |
| CV(%)            | 0.092                                        | 0.146 | 0.064 | 0.058 | 0.017 | 0.014 |

**Fig. 1S:** FT-IR spectra of magnetic IIP before and after removal of Cd(II) ions.

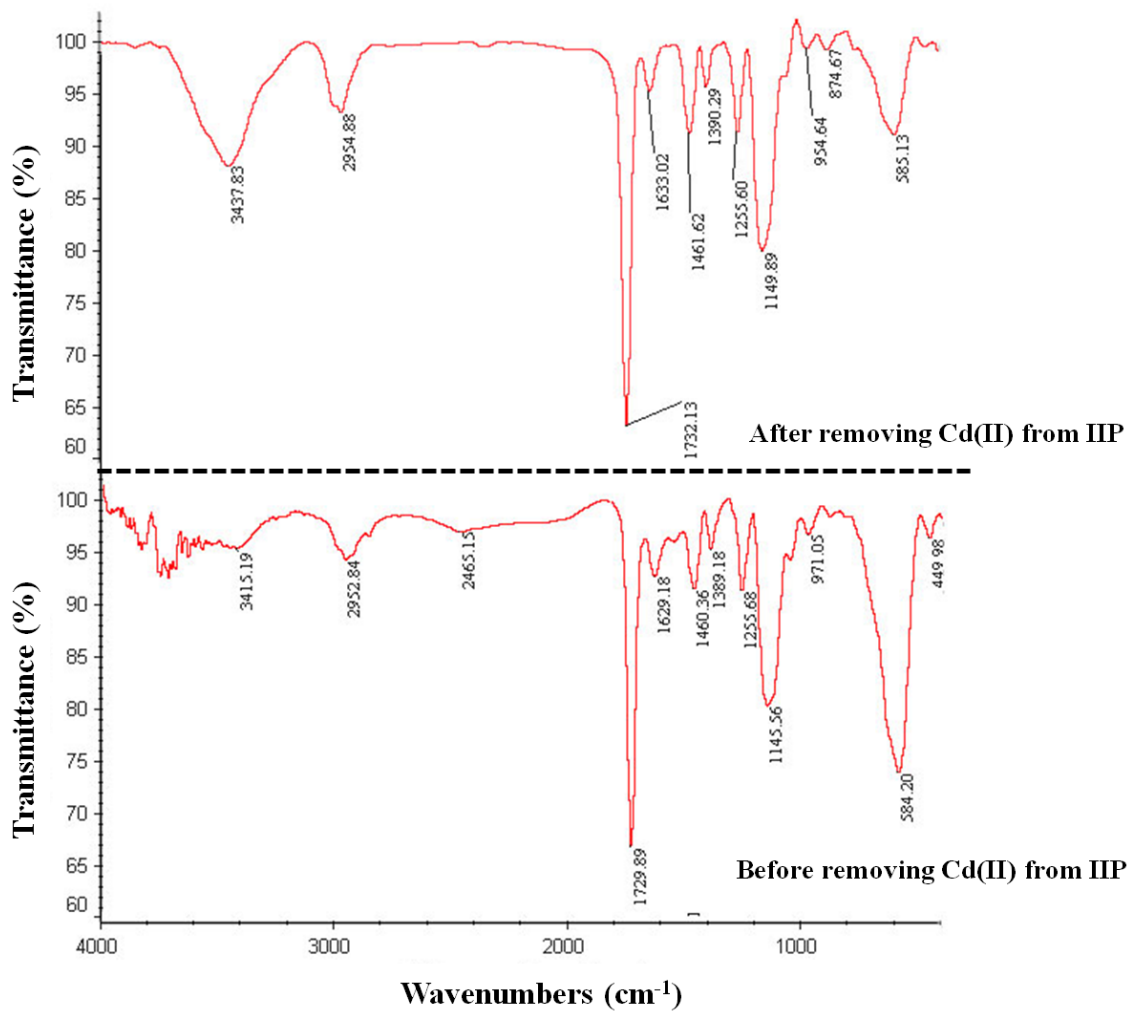

Fig. 2S: Thermal analysis of synthesized magnetic IIP: TGA curve and b: DAT curve.

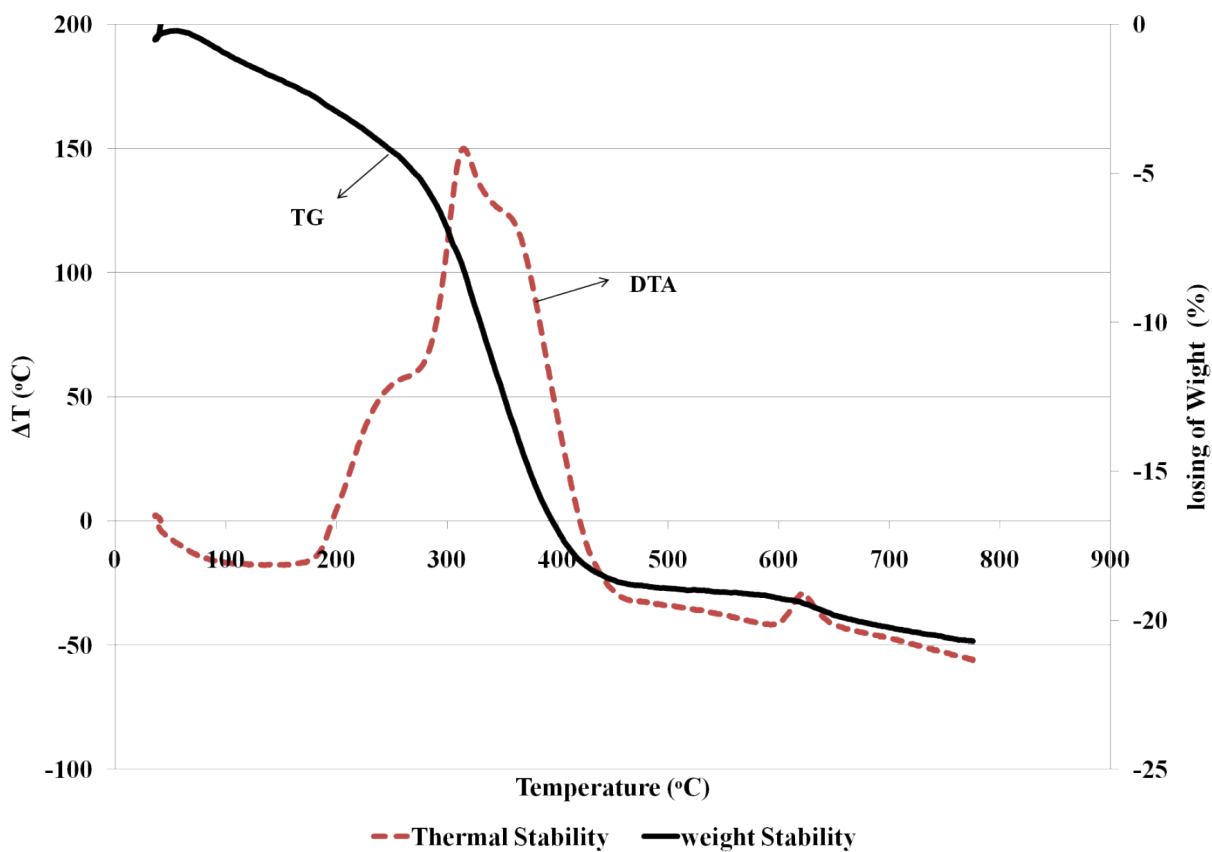

**Fig. 3S:** Effect of sample pH on the recovery of cadmium ions, Conditions: sample volume, 25 mL; initial concentration of cadmium ions, 0.5 mg L<sup>-1</sup>; eluent, 2 mol L<sup>-1</sup> of HCl; amount of sorbent, 20 mg; eluent volume, 4.0 mL; sorption time, 5.0 min; elution time, 5.0 min).

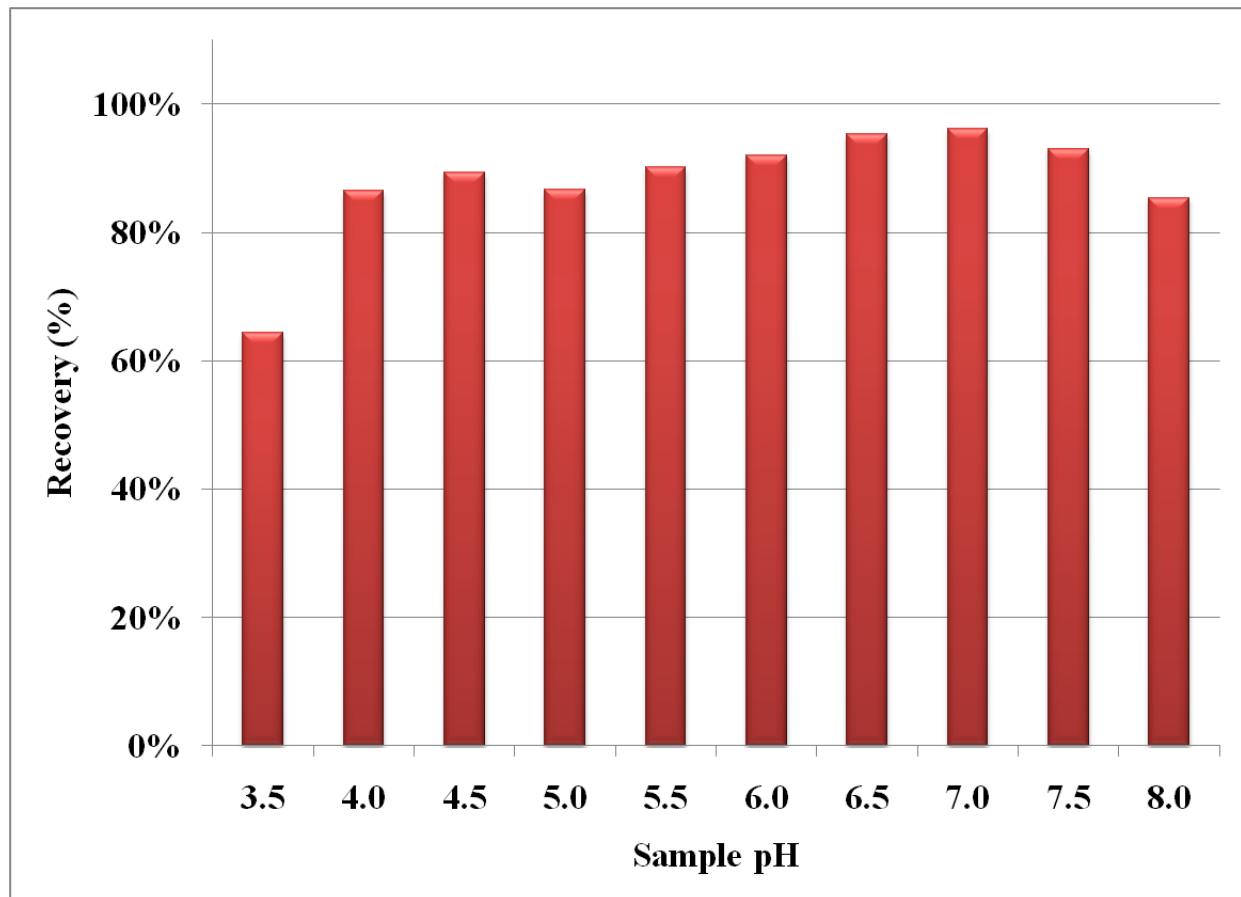

Supplement: c4ay03066d1.pdf [file c4ay03066d1.pdf]
